# Supplementary material for: Wastewater-based Surveillance Reveals Incomplete Gut Microbiome Recovery Following Easing of COVID-19 Restrictions in Wuhan, China
Source: Research Square preprint supplement (doi:10.21203/rs.3.rs-6822143/v1), 2025-08-11
Supplement: Supplementary file 1 [file 96facc835868bfd6d590d6cc.docx]

Supplementary Material for Wastewater-based Surveillance Reveals Incomplete Gut Microbiome Recovery Following Easing of COVID-19 Restrictions in Wuhan, China

Mengqi Zhanga, Jinyuan Xuea, Yue Wangb, Xiqing Lib*, Chaoqi Chena*

aSchool of Resource and Environmental Sciences, Wuhan University, Wuhan, 430079, P.R. China

bLaboratory of Earth Surface Processes, College of Urban and Environmental Sciences, Peking University, Beijing, 100871, P. R. China

*Corresponding authors, e-mail: chenchaoqi@whu.edu.cn, xli@urban.pku.edu.cn, , Phone/Fax: 86-10-62753246

Content

TextS1. Detailed Bioinformatics Workflow

Table S1. Sampling Information and Characteristics of Wastewater Treatment Plants Included in This Study

Table S2. Quality assessment metrics for metagenomic assemblies generated using MEGAHIT

Table S3. Commensal and Clinically Confirmed Pathogenic Genera and Their Constituent Species Identified in This Study

Table S4. Quality Assessment Metrics for Metagenomic Assemblies Generated Using MEGAHIT

Table S5. Functional pathways in this study

Table S6. List of clinically relevant antibiotic resistance genes (ARGs) detected in gut commensal bacteria

Figure S1. Locations of Wastewater Treatment Plants (WWTPs) in Wuhan, China.

Figure S2. Bioinformatic Workflow for Metagenomic Analysis in This Study.

Figure S3. Rarefaction Curves of all samples across five collection timepoints.

Figure S4. Spearman Correlations Between Commensal Genera and Gut Microbial Functional Pathways. Statistical significance is indicated by asterisks (p < 0.05, p < 0.01, p < 0.001).

Figure S5. Spearman Correlations Between Clinically Confirmed Pathogenic Genera and Virulence-Associated Functions. Statistical significance is indicated by asterisks (p < 0.05, p < 0.01, p < 0.001).

TextS1. Detailed Bioinformatics Workflow

Raw metagenomic sequencing reads were generated using the Illumina NovaSeq 6000 platform with paired-end 150 bp (PE150) sequencing. Quality control was performed using Fastp (Version 0.23.2) for quality control. Reads with an average Phred quality score below 15 or a length shorter than 15 bp were removed. Adapter sequences and reads containing more than five ambiguous bases (Ns) were also filtered out. Quality metrics after trimming were evaluated using FastQC (Version 0.11.9), including GC content, and the proportions of bases with Phred scores ≥Q20 and ≥Q30, and summarized in Supplementary Table S2.

**Taxonomic annotation**

Taxonomic annotation was performed using Kraken2 (Version 2.0.8-beta) with the PlusPFP database (Wood et al., 2019), which includes reference genomes of bacteria, archaea, viruses, fungi, and plasmids from RefSeq. Host genomes (e.g., human) are not included in this database, and no additional host removal was performed. To evaluate sequencing depth sufficiency, rarefaction curves were g were constructed at the species level using the rarecurve() function in the *vegan* R package (Version 2.6-4). Species-level abundance matrices were constructed based on Kraken2 outputs. Each sample was rarefied to 1,000,000 reads with a step size of 2,000. Curves were color-coded by sampling timepoint to visualize batch-level sequencing consistency. As shown in Supplementary Figure S3, all samples approached a plateau phase before 2 million reads, confirming sufficient sequencing depth.

To focus on the human gut microbiome, species assignments were cross-referenced against the Unified Human Gastrointestinal Protein (UHGP) catalog (Almeida et al., 2021). Only taxa listed in the UHGP catalog were retained for further analysis. This filtering step effectively removed environmental, host-derived, and non-bacterial taxa, including those of eukaryotic and viral origin. However, as UHGP may still include environmental derived or low gut prevalence, a two-step curation process was further applied.

First, each UHGP-matched species was evaluated through a structured literature review, prioritizing experimental evidence from animal models, clinical studies, or in vitro assays to determine relevance to the human gastrointestinal tract. As a result, 98 species were classified as commensal gut taxa, including probiotics and pathobionts. Second, species not retained as commensals were screened against PHI-base (Urban et al., 2020), which catalogs microbial species with experimentally confirmed human infectivity. This step identified 21 species as clinically important pathogens. A complete list of commensal and pathogenic species is provided in Supplementary Table S3.

For functional annotation, quality-controlled reads were de novo assembled using MEGAHIT (Version 1.2.9) with default parameters. Contigs shorter than 200 bp were excluded. Prodigal (Version 2.6.3) was used in metagenomic mode (-p meta) to predict open reading frames (ORFs) and generate corresponding nucleotide and protein sequences. To reduce redundancy, ORFs were clustered using *CD-HIT* (v4.8.1) with a 90% global sequence identity threshold and no constraints on alignment coverage, generating a non-redundant gene catalog.

**Functional annotation and pathway profiling**

Functional pathway profiling was performed using HUMAnN2 (Version 2.8.2) with the MetaCyc (Version 22.3) and UniRef90 databases. Gene family abundances were normalized to reads per kilobase per million mapped reads (RPKM) and aggregated into pathway-level relative abundances using total-sum normalization within each sample. Pathways were grouped into nine functional categories based on their higher-level classification in the MetaCyc hierarchy. A full list of assigned pathways and their grouping is provided in Supplementary Table S5.

**Antibiotic resistance gene (ARG) and virulence factor profiling**

ARGs were annotated using ARGs-OAP (Version 3.2.4) with the SARG database (Version 3.2.1-L) (Yin et al., 2022). Assembled contigs were aligned to the ARG reference sequences using BLASTX with a minimum identity of 80%, an E-value less than 1E-5, and a minimum alignment length of 25 amino acids. Contigs carrying ARGs were subsequently aligned to the NCBI NR database (Version 2024-02) using DIAMOND (Version 2.1.10) with optimized sensitivity and an E-value less than 1E-5 to identify potential microbial hosts.

Virulence factors were identified by aligning predicted protein sequences to the VFDB core database (Chen et al., 2005) using DIAMOND under the same alignment settings. Alignments with an E-value less than 1E-5 and a minimum alignment coverage of 70% were retained.

Table S1. Sampling Information and Characteristics of Wastewater Treatment Plants Included in This Study

| Sampling Date | Sample Name | WWTPs | Service Population (×104) | Daily Flow Rate (×10⁴ t/d) |
| --- | --- | --- | --- | --- |
| Spring 2021 (n=27) | | | | |
| 2021.4.7-9 | 202104-BX | Bao Xie | 15.7 | 4.8 |
| 2021.4.7-9 | 202104-CD | Cai Dian | 46.9 | 8.0 |
| 2021.4.7-9 | 202104-DXH | Dong Xi Hu | 19.9 | 4.5 |
| 2021.4.7-9 | 202104-ELM | Er Lang Miao | 91.4 | 17 |
| 2021.4.7-9 | 202104-HJH | Huang Jia Hu | 100 | 19 |
| 2021.4.7-9 | 202104-HJK | Huang Jin Kou | 6.9 | 1.3 |
| 2021.4.7-9 | 202104-HL | Huang Ling | 13.6 | 3.0 |
| 2021.4.7-9 | 202104-HPL | Huang Pu Lu | 28.8 | 5.5 |
| 2021.4.7-9 | 202104-HS | Hua Shan | 7.8 | 1.5 |
| 2021.4.7-9 | 202104-HX | Han Xi | 205 | 56 |
| 2021.4.7-9 | 202104-JG | Jin Gang | 2.2 | 0.5 |
| 2021.4.7-9 | 202104-JX | Jiang Xia | 89.7 | 17 |
| 2021.4.7-9 | 202104-KLGG | Ke Liang Guang Gu | 11.4 | 2.5 |
| 2021.4.7-9 | 202104-LBZ | Luo Bu Zui | 35.4 | 6.7 |
| 2021.4.8-10 | 202104-LWZ | Long Wang Zui | 75.0 | 14 |
| 2021.4.7-9 | 202104-NTZH | Nan Tai Zi Hu | 200 | 38 |
| 2021.4.7-9 | 202104-SH | Sha Hu | 89.4 | 15 |
| 2021.4.7-9 | 202104-SJT | San Jin Tan | 232 | 44 |
| 2021.4.7-9 | 202104-SM | Sha Mao | 21.3 | 4.3 |
| 2021.4.7-9 | 202104-TXH | Tang Xun Hu | 46.5 | 8.9 |
| 2021.4.7-9 | 202104-WH | Wu Hu | 8.8 | 1.7 |
| 2021.4.7-9 | 202104-XC | Xin Chuan | 17.4 | 3.3 |
| 2021.4.7-9 | 202104-XCC | Xin Cheng | 14.8 | 5.5 |
| 2021.4.7-9 | 202104-XL | Xin Long | 15.8 | 4.3 |
| 2021.4.7-9 | 202104-YL | Yang Luo | 15.9 | 5 |
| 2021.4.7-9 | 202104-ZC | Zhu Cheng | 17.0 | 3.4 |
| 2021.4.7-9 | 202104-ZL | Zuo Ling | 12.6 | 6 |
| Spring 2023 (n=18) | | | | |
| 2023.3.12-14 | 202303-ELM | Er Lang Miao | 91.4 | 17 |
| 2023.3.13-15 | 202303-HJH | Huang Jia Hu | 101 | 19 |
| 2023.3.13-15 | 202303-HJK | Huang Jin Kou | 6.9 | 1.3 |
| 2023.3.12-14 | 202303-HL | Huang Ling | 14.5 | 3.4 |
| 2023.3.12-14 | 202303-HPL | Huang Pu Lu | 35.2 | 6.7 |
| 2023.3.12-14 | 202303-HS | Hua Shan | 13.0 | 2.5 |
| 2023.3.12-14 | 202303-JX | Jiang Xia | 89.7 | 17 |
| 2023.3.12-14 | 202303-LBZ | Luo Bu Zui | 35.4 | 6.7 |
| 2023.3.12-14 | 202303-LWZ | Long Wang Zui | 113 | 21 |
| 2023.3.13-15 | 202303-NTZH | Nan Tai Zi Hu | 200 | 38 |
| 2023.3.12-14 | 202303-SM | Sha Mao | 21.3 | 4.3 |
| 2023.3.13-15 | 202303-WH | Wu Hu | 8.8 | 1.7 |
| 2023.3.12-14 | 202303-XC | Xin Chuan | 18.0 | 3.4 |
| 2023.3.12-14 | 202303-XCC | Xin Cheng | 19.6 | 7.4 |
| 2023.3.12-14 | 202303-XL | Xin Long | 17.3 | 4.7 |
| 2023.3.12-14 | 202303-YL | Yang Luo | 19.7 | 6.2 |
| 2023.3.12-14 | 202303-ZC | Zhu Cheng | 18.0 | 3.6 |
| 2023.3.12-14 | 202303-ZL | Zuo Ling | 15.6 | 7.4 |
| Summer 2023 (n=23) | | | | |
| 2023.7.15-17 | 202307-BH | Bei Hu | 276 | 53 |
| 2023.7.16-18 | 202307-CD | Cai Dian | 52.3 | 9.9 |
| 2023.7.16-18 | 202307-HJH | Huang Jia Hu | 101 | 19 |
| 2023.7.16-18 | 202307-HJK | Huang Jin Kou | 6.9 | 1.3 |
| 2023.7.16-18 | 202307-HPL | Huang Pu Lu | 35.2 | 6.7 |
| 2023.7.15-17 | 202307-HS | Hua Shan | 13.0 | 2.5 |
| 2023.7.15-17 | 202307-HX | Han Xi | 205 | 56 |
| 2023.7.15-17 | 202307-JS | Jun Shan | 2.9 | 0.6 |
| 2023.7.16-18 | 202307-JX | Jiang Xia | 89.7 | 17 |
| 2023.7.15-17 | 202307-KLGG | Ke Liang Guang Gu | 12.1 | 2.3 |
| 2023.7.16-18 | 202307-LBZ | Luo Bu Zui | 35.4 | 6.7 |
| 2023.7.16-18 | 202307-LWZ | Long Wang Zui | 113 | 21 |
| 2023.7.16-18 | 202307-NTZH | Nan Tai Zi Hu | 200 | 38 |
| 2023.7.15-17 | 202307-SJT | San Jin Tan | 232 | 44 |
| 2023.7.15-17 | 202307-SM | Sha Mao | 21.3 | 4.3 |
| 2023.7.15-17 | 202307-TXH | Tang Xun Hu | 75.6 | 14 |
| 2023.7.16-18 | 202307-WH | Wu Hu | 8.8 | 1.7 |
| 2023.7.15-17 | 202307-XC | Xin Chuan | 18.0 | 3.4 |
| 2023.7.16-18 | 202307-XCC | Xin Cheng | 19.6 | 7.4 |
| 2023.7.15-17 | 202307-XL | Xin Long | 17.3 | 4.7 |
| 2023.7.15-17 | 202307-YL | Yang Luo | 19.7 | 6.2 |
| 2023.7.15-17 | 202307-ZC | Zhu Cheng | 18.0 | 3.6 |
| 2023.7.15-17 | 202307-ZL | Zuo Ling | 15.6 | 7.4 |
| Winter 2023 (n=14) | | | | |
| 2023.12.3-5 | 202312-DXH | Dong Xi Hu | 19.9 | 4.5 |
| 2023.12.2-4 | 202312-ELM | Er Lang Miao | 91.4 | 17.4 |
| 2023.12.3-5 | 202312-HL | Huang Ling | 14.5 | 3.4 |
| 2023.12.2-4 | 202312-HPL | Huang Pu Lu | 35.2 | 6.7 |
| 2023.12.2-4 | 202312-HX | Han Xi | 205 | 56 |
| 2023.12.3-5 | 202312-JX | Jiang Xia | 89.7 | 17 |
| 2023.12.2-4 | 202312-LBZ | Luo Bu Zui | 35.4 | 6.7 |
| 2023.12.3-5 | 202312-LWZ | Long Wang Zui | 113 | 21 |
| 2023.12.2-4 | 202312-SJT | San Jin Tan | 232 | 44 |
| 2023.12.2-4 | 202312-SM | Sha Mao | 21.3 | 4.3 |
| 2023.12.2-4 | 202312-XC | Xin Chuan | 18.0 | 3.4 |
| 2023.12.2-4 | 202312-XCC | Xin Cheng | 19.6 | 7.4 |
| 2023.12.2-4 | 202312-XL | Xin Long | 17.3 | 4.7 |
| 2023.12.2-4 | 202312-ZC | Zhu Cheng | 18.0 | 3.6 |
| Spring 2024 (n=26) | | | | |
| 2024.4.18-20 | 202404-BH | Bei Hu | 276 | 53 |
| 2024.4.18-20 | 202404-BX | Bao Xie | 15.7 | 4.8 |
| 2024.4.18-20 | 202404-DXH | Dong Xi Hu | 44.8 | 10 |
| 2024.4.18-20 | 202404-ELM | Er Lang Miao | 91.4 | 17 |
| 2024.4.18-20 | 202404-HJH | Huang Jia Hu | 101 | 19 |
| 2024.4.18-20 | 202404-HJK | Huang Jin Kou | 6.9 | 1.3 |
| 2024.4.18-20 | 202404-HL | Huang Ling | 14.5 | 3.4 |
| 2024.4.18-20 | 202404-HPL | Huang Pu Lu | 35.2 | 6.7 |
| 2024.4.18-20 | 202404-HS | Hua Shan | 13.0 | 2.5 |
| 2024.4.18-20 | 202404-HX | Han Xi | 205 | 56 |
| 2024.4.18-20 | 202404-JS | Jun Shan | 2.9 | 0.6 |
| 2024.4.18-20 | 202404-JX | Jiang Xia | 89.7 | 17 |
| 2024.4.18-20 | 202404-KLGG | Ke Liang Guang Gu | 12.1 | 2.3 |
| 2024.4.18-20 | 202404-LBZ | Luo Bu Zui | 35.4 | 6.7 |
| 2024.4.18-20 | 202404-LWZ | Long Wang Zui | 113 | 21 |
| 2024.4.18-20 | 202404-NTZH | Nan Tai Zi Hu | 200 | 38 |
| 2024.4.18-20 | 202404-SJT | San Jin Tan | 231 | 44 |
| 2024.4.18-20 | 202404-SM | Sha Mao | 21.3 | 4.3 |
| 2024.4.18-20 | 202404-TXH | Tang Xun Hu | 75.6 | 14 |
| 2024.4.18-20 | 202404-WH | Wu Hu | 8.8 | 1.7 |
| 2024.4.18-20 | 202404-XC | Xin Chuan | 18.0 | 3.4 |
| 2024.4.18-20 | 202404-XCC | Xin Cheng | 19.6 | 7.4 |
| 2024.4.18-20 | 202404-XL | Xin Long | 17.3 | 4.7 |
| 2024.4.18-20 | 202404-YL | Yang Luo | 19.7 | 6.2 |
| 2024.4.18-20 | 202404-ZC | Zhu Cheng | 18.0 | 3.6 |
| 2024.4.18-20 | 202404-ZL | Zuo Ling | 15.6 | 7.4 |

Table S2. Summary of Metagenomic Sequencing Data for Wastewater Samples

| Sample name | Accession number | Raw Data (Gb) | Number of clean reads | Q20 (%) | Q30 (%) | | GC(%) |
| --- | --- | --- | --- | --- | --- | --- |
| 202104-BX | SAMC5004269 | 11.16 | 3.72E+07 | 97.46 | 93.17 | 55.60 |
| 202104-CD | SAMC5004270 | 13.35 | 4.45E+07 | 97.58 | 93.37 | 58.35 |
| 202104-DXH | SAMC5004271 | 10.74 | 3.58E+07 | 97.22 | 92.70 | 53.97 |
| 202104-ELM | SAMC5004272 | 11.34 | 3.78E+07 | 97.30 | 92.69 | 48.91 |
| 202104-HJH | SAMC5004273 | 11.34 | 3.78E+07 | 97.62 | 93.32 | 51.08 |
| 202104-HJK | SAMC5004274 | 10.02 | 3.34E+07 | 97.37 | 92.92 | 54.28 |
| 202104-HL | SAMC5004275 | 12.60 | 4.20E+07 | 97.36 | 93.07 | 59.52 |
| 202104-HPL | SAMC5004276 | 10.68 | 3.56E+07 | 97.33 | 92.64 | 53.28 |
| 202104-HS | SAMC5004277 | 12.72 | 4.24E+07 | 97.62 | 93.44 | 56.79 |
| 202104-HX | SAMC5004278 | 10.17 | 3.39E+07 | 97.69 | 93.64 | 57.79 |
| 202104-JG | SAMC5004279 | 11.46 | 3.82E+07 | 97.40 | 92.99 | 56.85 |
| 202104-JX | SAMC5004280 | 10.71 | 3.57E+07 | 97.01 | 92.12 | 54.71 |
| 202104-KLGG | SAMC5004281 | 10.83 | 3.61E+07 | 97.45 | 93.11 | 58.75 |
| 202104-LBZ | SAMC5004282 | 12.75 | 4.25E+07 | 97.65 | 93.45 | 55.08 |
| 202104-LWZ | SAMC5004283 | 11.79 | 3.93E+07 | 97.51 | 92.88 | 47.52 |
| 202104-NTZH | SAMC5004284 | 10.65 | 3.55E+07 | 97.58 | 93.38 | 58.40 |
| 202104-SH | SAMC5004285 | 13.02 | 4.34E+07 | 97.32 | 92.84 | 48.29 |
| 202104-SJT | SAMC5004286 | 10.80 | 3.60E+07 | 97.27 | 92.74 | 55.38 |
| 202104-SM | SAMC5004287 | 11.82 | 3.94E+07 | 97.63 | 93.42 | 53.99 |
| 202104-TXH | SAMC5004288 | 9.45 | 3.15E+07 | 97.57 | 93.41 | 55.14 |
| 202104-WH | SAMC5004289 | 9.93 | 3.31E+07 | 97.27 | 92.75 | 56.69 |
| 202104-XC | SAMC5004290 | 12.18 | 4.06E+07 | 97.49 | 93.13 | 57.50 |
| 202104-XCC | SAMC5004291 | 9.27 | 3.09E+07 | 97.33 | 92.82 | 57.72 |
| 202104-XL | SAMC5004292 | 8.97 | 2.99E+07 | 97.42 | 92.89 | 51.78 |
| 202104-YL | SAMC5004293 | 11.19 | 3.73E+07 | 97.22 | 92.68 | 56.32 |
| 202104-ZC | SAMC5004294 | 9.81 | 3.27E+07 | 97.43 | 92.83 | 51.04 |
| 202104-ZL | SAMC5004295 | 11.88 | 3.96E+07 | 97.36 | 92.93 | 56.91 |
| 202303-ELM | SAMC5004296 | 10.05 | 3.35E+07 | 99.01 | 97.19 | 48.43 |
| 202303-HJH | SAMC5004297 | 11.64 | 3.88E+07 | 98.83 | 96.66 | 58.54 |
| 202303-HJK | SAMC5004298 | 13.71 | 4.57E+07 | 99.07 | 97.36 | 48.97 |
| 202303-HL | SAMC5004299 | 13.44 | 4.48E+07 | 99.00 | 97.13 | 58.97 |
| 202303-HPL | SAMC5004300 | 12.90 | 4.30E+07 | 98.92 | 96.92 | 52.14 |
| 202303-HS | SAMC5004301 | 10.47 | 3.49E+07 | 98.89 | 96.79 | 51.62 |
| 202303-JX | SAMC5004302 | 12.18 | 4.06E+07 | 99.02 | 97.20 | 51.68 |
| 202303-LBZ | SAMC5004303 | 12.06 | 4.02E+07 | 99.01 | 97.18 | 50.49 |
| 202303-LWZ | SAMC5004304 | 14.25 | 4.75E+07 | 99.06 | 97.38 | 45.89 |
| 202303-NTZH | SAMC5004305 | 12.33 | 4.11E+07 | 99.03 | 97.30 | 45.39 |
| 202303-SM | SAMC5004306 | 11.22 | 3.74E+07 | 98.97 | 97.07 | 49.98 |
| 202303-WH | SAMC5004307 | 12.66 | 4.22E+07 | 99.12 | 97.60 | 45.74 |
| 202303-XC | SAMC5004308 | 13.95 | 4.65E+07 | 98.96 | 97.00 | 58.30 |
| 202303-XCC | SAMC5004309 | 11.10 | 3.70E+07 | 98.90 | 96.85 | 51.24 |
| 202303-XL | SAMC5004310 | 14.40 | 4.80E+07 | 99.16 | 97.63 | 57.76 |
| 202303-YL | SAMC5004311 | 10.89 | 3.63E+07 | 98.89 | 96.76 | 55.20 |
| 202303-ZC | SAMC5004312 | 12.84 | 4.28E+07 | 99.07 | 97.41 | 46.42 |
| 202303-ZL | SAMC5004313 | 12.06 | 4.02E+07 | 98.96 | 97.01 | 52.98 |
| 202307-BH | SAMC5004314 | 12.09 | 4.03E+07 | 98.99 | 97.10 | 55.69 |
| 202307-CD | SAMC5004315 | 11.04 | 3.68E+07 | 98.97 | 97.04 | 53.18 |
| 202307-HJH | SAMC5004316 | 10.17 | 3.39E+07 | 98.94 | 96.98 | 52.27 |
| 202307-HJK | SAMC5004317 | 12.60 | 4.20E+07 | 99.11 | 97.57 | 50.57 |
| 202307-HPL | SAMC5004318 | 12.48 | 4.16E+07 | 99.05 | 97.30 | 47.63 |
| 202307-HS | SAMC5004319 | 11.97 | 3.99E+07 | 99.02 | 97.17 | 55.70 |
| 202307-HX | SAMC5004320 | 10.80 | 3.60E+07 | 98.90 | 96.82 | 51.86 |
| 202307-JS | SAMC5004321 | 10.05 | 3.35E+07 | 98.73 | 96.41 | 53.09 |
| 202307-JX | SAMC5004322 | 12.75 | 4.25E+07 | 98.98 | 97.06 | 54.95 |
| 202307-KLGG | SAMC5004323 | 13.77 | 4.59E+07 | 99.07 | 97.33 | 55.67 |
| 202307-LBZ | SAMC5004324 | 13.32 | 4.44E+07 | 99.10 | 97.46 | 46.51 |
| 202307-LWZ | SAMC5004325 | 11.01 | 3.67E+07 | 98.93 | 96.91 | 52.60 |
| 202307-NTZH | SAMC5004326 | 11.25 | 3.75E+07 | 99.03 | 97.22 | 48.45 |
| 202307-SJT | SAMC5004327 | 12.78 | 4.26E+07 | 99.12 | 97.51 | 48.50 |
| 202307-SM | SAMC5004328 | 11.49 | 3.83E+07 | 99.03 | 97.20 | 52.98 |
| 202307-TXH | SAMC5004329 | 10.14 | 3.38E+07 | 98.99 | 97.06 | 53.03 |
| 202307-WH | SAMC5004330 | 11.04 | 3.68E+07 | 99.10 | 97.44 | 48.83 |
| 202307-XC | SAMC5004331 | 11.79 | 3.93E+07 | 98.89 | 96.80 | 58.63 |
| 202307-XCC | SAMC5004332 | 11.46 | 3.82E+07 | 98.96 | 97.01 | 50.55 |
| 202307-XL | SAMC5004333 | 10.59 | 3.53E+07 | 99.02 | 97.18 | 52.35 |
| 202307-YL | SAMC5004334 | 11.76 | 3.92E+07 | 98.94 | 96.93 | 53.05 |
| 202307-ZC | SAMC5004335 | 11.97 | 3.99E+07 | 98.97 | 97.04 | 54.81 |
| 202307-ZL | SAMC5004336 | 9.09 | 3.03E+07 | 98.95 | 96.97 | 53.25 |
| 202312-DXH | SAMC5004337 | 9.18 | 3.06E+07 | 96.39 | 92.97 | 56.44 |
| 202312-ELM | SAMC5004338 | 13.53 | 4.51E+07 | 96.62 | 93.40 | 52.12 |
| 202312-HPL | SAMC5004339 | 13.08 | 4.36E+07 | 96.48 | 93.12 | 52.54 |
| 202312-HX | SAMC5004340 | 13.38 | 4.46E+07 | 96.49 | 93.18 | 54.73 |
| 202312-HL | SAMC5004341 | 48.00 | 1.60E+08 | 96.33 | 92.86 | 58.14 |
| 202312-JX | SAMC5004342 | 13.50 | 4.50E+07 | 96.41 | 92.94 | 57.26 |
| 202312-LBZ | SAMC5004343 | 12.87 | 4.29E+07 | 96.76 | 93.61 | 52.46 |
| 202312-LWZ | SAMC5004344 | 12.24 | 4.08E+07 | 96.44 | 93.03 | 55.35 |
| 202312-SJT | SAMC5004345 | 13.08 | 4.36E+07 | 96.72 | 93.53 | 49.14 |
| 202312-SM | SAMC5004346 | 13.47 | 4.49E+07 | 96.54 | 93.19 | 51.95 |
| 202312-XC | SAMC5004347 | 14.52 | 4.84E+07 | 96.53 | 93.21 | 50.77 |
| 202312-XCC | SAMC5004348 | 15.69 | 5.23E+07 | 96.67 | 93.47 | 48.71 |
| 202312-XL | SAMC5004349 | 13.11 | 4.37E+07 | 96.27 | 92.76 | 54.57 |
| 202312-ZC | SAMC5004350 | 11.94 | 3.98E+07 | 96.76 | 93.62 | 55.83 |
| 202404-BH | SAMC5004351 | 11.91 | 3.97E+07 | 99.29 | 97.29 | 55.50 |
| 202404-BX | SAMC5004352 | 13.44 | 4.48E+07 | 99.41 | 97.72 | 57.87 |
| 202404-DXH | SAMC5004353 | 12.57 | 4.19E+07 | 99.21 | 96.98 | 56.13 |
| 202404-ELM | SAMC5004354 | 11.34 | 3.78E+07 | 99.51 | 98.08 | 55.77 |
| 202404-HJH | SAMC5004355 | 11.43 | 3.81E+07 | 99.55 | 98.22 | 54.59 |
| 202404-HJK | SAMC5004356 | 10.56 | 3.52E+07 | 99.48 | 97.97 | 57.01 |
| 202404-HL | SAMC5004357 | 12.42 | 4.14E+07 | 99.41 | 97.70 | 59.46 |
| 202404-HPL | SAMC5004358 | 10.44 | 3.48E+07 | 99.36 | 97.43 | 53.05 |
| 202404-HS | SAMC5004359 | 12.24 | 4.08E+07 | 99.44 | 97.78 | 53.85 |
| 202404-HX | SAMC5004360 | 10.56 | 3.52E+07 | 99.38 | 97.52 | 55.43 |
| 202404-JS | SAMC5004361 | 12.69 | 4.23E+07 | 99.52 | 98.16 | 56.93 |
| 202404-JX | SAMC5004362 | 11.76 | 3.92E+07 | 99.49 | 97.96 | 55.35 |
| 202404-KLGG | SAMC5004363 | 10.98 | 3.66E+07 | 99.50 | 98.05 | 57.65 |
| 202404-LBZ | SAMC5004364 | 10.71 | 3.57E+07 | 99.41 | 97.67 | 55.86 |
| 202404-LWZ | SAMC5004365 | 11.79 | 3.93E+07 | 99.44 | 97.84 | 56.70 |
| 202404-NTZH | SAMC5004366 | 13.08 | 4.36E+07 | 99.64 | 98.58 | 51.58 |
| 202404-SJT | SAMC5004367 | 11.91 | 3.97E+07 | 99.44 | 97.80 | 58.26 |
| 202404-SM | SAMC5004368 | 11.37 | 3.79E+07 | 99.43 | 97.77 | 56.46 |
| 202404-TXH | SAMC5004369 | 10.38 | 3.46E+07 | 99.46 | 97.85 | 54.34 |
| 202404-WH | SAMC5004370 | 11.79 | 3.93E+07 | 99.43 | 97.77 | 57.14 |
| 202404-XC | SAMC5004371 | 10.38 | 3.46E+07 | 99.04 | 96.89 | 57.39 |
| 202404-XCC | SAMC5004372 | 10.47 | 3.49E+07 | 99.46 | 97.87 | 54.77 |
| 202404-XL | SAMC5004373 | 11.94 | 3.98E+07 | 99.44 | 97.82 | 56.64 |
| 202404-YL | SAMC5004374 | 12.72 | 4.24E+07 | 99.45 | 97.85 | 58.15 |
| 202404-ZC | SAMC5004375 | 10.92 | 3.64E+07 | 99.35 | 97.48 | 58.28 |
| 202404-ZL | SAMC5004376 | 10.98 | 3.66E+07 | 99.45 | 97.79 | 56.05 |

Table S3. Commensal and Clinically Confirmed Pathogenic Genera and Their Constituent Species Identified in This Study

| Genus | Species (Abbreviated) | Citations | |
| --- | --- | --- | --- |
| Commensal taxa | | | |
| Adlercreutzia | A. equolifaciens | Oñate et al., 2023 | |
| Agathobacter | A. rectalis | Lv et al., 2024 | |
| Akkermansia | A. muciniphila | Everard et al., 2013 | |
| Alistipes | A. finegoldii, *A. onderdonkii* | ​​Takeuchi et al., 2023; Liu et al., 2025 | |
| Anaerostipes | A. caccae, A. hadrus | Lyu et al., 2024;Liu et al., 2024 | |
| Bacteroides | B. caccae, B. cellulosilyticus, B. eggerthii, B. faecis, B. intestinalis, B. ovatus, B. salyersiae, B. stercoris, B. thetaiotaomicron, B. uniformis, B. xylanisolvens | Mandal et al., 2023;Jie et al., 2023;Dziarski et al., 2016; Mohebali et al., 2023;Yasuma et al., 2021;Ihekweazu et al., 2021;Wang et al., 2024;Ryu et al., 2023;Li et al., 2024;Liu et al., 2024;Fu et al., 2023 | |
| Bifidobacterium | B. adolescentis, B. angulatum, B. animalis, B. bifidum, B. breve, B. catenulatum, B. dentium, B. pseudocatenulatum | Fan et al., 2021;Moens et al., 2016;Balaguer et al., 2022;Kim et al., 2022;Shiver et al., 2025;Zha et al., 2022;Engevik et al., 2019;Zeng et al., 2024 | |
| Blautia | B. hansenii, B. producta | Shibata et al., 2023;Yang et al., 2022 | |
| Butyricimonas | B. virosa | Lee et al., 2022 | |
| Catenibacterium | C. mitsuokai | Jaagura et al., 2022 | |
| Christensenella | C. minuta | Akbuğa-Schön et al., 2024 | |
| Clostridium | C. butyricum | Chen et al., 2020 | |
| Collinsella | C. aerofaciens, C. stercoris | Wolf et al., 2019;Doden et al., 2021 | |
| Coprococcus | C. eutactus | Xu et al., 2024 | |
| Desulfovibrio | D. piger | Tang et al., 2024 | |
| Dialister | D. succinatiphilus | Morotomi et al., 2008 | |
| Dorea | D. formicigenerans, D. longicatena | Zhang et al., 2023;Prudêncio et al., 2023 | |
| Eggerthella | E. lenta | Wang et al., 2025 | |
| Eubacterium | E. limosum | Kanauchi et al., 2006 | |
| Flavonifractor | F. plautii | Luo et al., 2023 | |
| Gordonibacter | G. pamelaeae, G. urolithinfaciens | McCurry et al., 2024;Toney et al., 2020 | |
| Hungatella | H. hathewayi | Bou et al., 2024 | |
| Intestinimonas | I. butyriciproducens | Rampanelli et al., 2025 | |
| Lactobacillus | L. acidophilus, L. amylovorus, L. gasseri, L. intestinalis, L. johnsonii | Babińska et al., 2005;Wu et al., 2024;Pan et al., 2024;Ma et al., 2022;Davoren et al., 2019 | |
| Megamonas | M. funiformis, M. hypermegale | Yang et al., 2023;​​Sato et al., 2019 | |
| Odoribacter | O. splanchnicus | Chen et al., 2025 | |
| Parabacteroides | P. distasonis, P. goldsteinii, P. johnsonii, P. merdae | Ezeji et al., 2021;Lai et al., 2022;Cui et al., 2022;Qiao et al., 2022 | |
| Phascolarctobacterium | P. faecium | Liébana-García et al., 2025 | |
| Roseburia | R. hominis, R. intestinalis | Huang et al., 2025;Zhang et al., 2022 | |
| Veillonella | V. atypica, V. dispar, V. parvula | Scheiman et al., 2019;Zhang et al, 2023;Zhan et al., 2022 | |
| Clinically confirmed pathogenic taxa | | |  | |
| *Bacteroides* | *B. fragilis* | Xia et al., 2023; | |
| *Clostridioides* | *C. difficile* | Meza-Torres et al., 2025 | |
| *Enterobacter* | *E. cloacae* | Soria-Bustos et al., 2020 | |
| *Enterococcus* | *E. faecalis* | Chong et al., 2017 | |
| *Klebsiella* | *K. pneumoniae* | Tan et al., 2024 | |
| *Morganella* | *M. morganii* | Vallier et al., 2023 | |
| *Proteus* | *P. mirabilis*, *P. penneri* | Kiani et al., 2021; Hamilton et al., 2021 | |
| *Providencia* | *P. alcalifaciens* | Klein et al., 2024 | |
| *Staphylococcus* | *S. aureus* | Sarah et al., 2020 | |
| *Streptococcus* | *S. agalactiae* | Joyce et al., 2024 | |

Table S4. Quality Assessment Metrics for Metagenomic Assemblies Generated Using MEGAHIT.

| Sample name | Number of Assembled contigs | Total Length (bp) | Average Contig Length (bp) | Max. Contig length d(bp) | N50 (bp) |
| --- | --- | --- | --- | --- | --- |
| 202104-BX | 5.31E+05 | 4.01E+08 | 755 | 6.30E+05 | 879 |
| 202104-CD | 2.19E+05 | 1.63E+08 | 743 | 1.15E+05 | 817 |
| 202104-DXH | 2.18E+05 | 1.65E+08 | 760 | 1.92E+05 | 880 |
| 202104-ELM | 7.14E+05 | 5.46E+08 | 764 | 2.55E+05 | 1029 |
| 202104-HJH | 7.05E+05 | 5.17E+08 | 734 | 7.34E+05 | 1052 |
| 202104-HJK | 5.08E+05 | 4.44E+08 | 873 | 5.64E+05 | 1159 |
| 202104-HL | 6.26E+05 | 5.36E+08 | 856 | 5.88E+05 | 1206 |
| 202104-HPL | 6.75E+05 | 5.08E+08 | 752 | 2.42E+05 | 898 |
| 202104-HS | 7.10E+05 | 7.56E+08 | 1064 | 4.05E+05 | 1085 |
| 202104-HX | 5.63E+05 | 4.78E+08 | 849 | 4.01E+05 | 1098 |
| 202104-JG | 5.26E+05 | 4.23E+08 | 805 | 3.59E+05 | 971 |
| 202104-JX | 5.74E+05 | 4.35E+08 | 757 | 2.55E+05 | 877 |
| 202104-KLGG | 5.53E+05 | 4.19E+08 | 757 | 2.20E+05 | 902 |
| 202104-LBZ | 8.22E+05 | 6.57E+08 | 800 | 3.25E+05 | 1134 |
| 202104-LWZ | 7.54E+05 | 6.05E+08 | 803 | 2.24E+05 | 1106 |
| 202104-NTZH | 6.01E+05 | 6.17E+08 | 1026 | 1.84E+05 | 1022 |
| 202104-SH | 6.68E+05 | 6.53E+08 | 978 | 4.19E+05 | 1457 |
| 202104-SJT | 5.84E+05 | 4.96E+08 | 849 | 4.99E+05 | 1077 |
| 202104-SM | 5.76E+05 | 4.83E+08 | 837 | 3.43E+05 | 1105 |
| 202104-TXH | 4.97E+05 | 3.42E+08 | 688 | 2.62E+05 | 743 |
| 202104-WH | 4.55E+05 | 3.72E+08 | 817 | 3.11E+05 | 1008 |
| 202104-XC | 7.35E+05 | 6.34E+08 | 863 | 4.95E+05 | 1116 |
| 202104-XCC | 4.84E+05 | 4.04E+08 | 834 | 1.85E+05 | 1067 |
| 202104-XL | 5.58E+05 | 4.76E+08 | 855 | 2.11E+05 | 1177 |
| 202104-YL | 5.75E+05 | 4.72E+08 | 820 | 4.90E+05 | 1007 |
| 202104-ZC | 4.20E+05 | 4.36E+08 | 1040 | 4.36E+05 | 1886 |
| 202104-ZL | 6.47E+05 | 4.96E+08 | 766 | 1.87E+05 | 874 |
| 202303-ELM | 1.17E+06 | 7.90E+08 | 676 | 3.19E+05 | 697 |
| 202303-HJH | 1.67E+06 | 1.07E+09 | 640 | 8.40E+04 | 651 |
| 202303-HJK | 1.64E+06 | 1.03E+09 | 625 | 1.07E+05 | 637 |
| 202303-HL | 1.86E+06 | 1.17E+09 | 631 | 8.60E+04 | 646 |
| 202303-HPL | 1.37E+06 | 8.87E+08 | 647 | 2.62E+05 | 659 |
| 202303-HS | 1.17E+06 | 7.89E+08 | 675 | 8.53E+04 | 703 |
| 202303-JX | 1.48E+06 | 9.48E+08 | 643 | 3.01E+05 | 648 |
| 202303-LBZ | 1.49E+06 | 9.73E+08 | 652 | 1.14E+05 | 668 |
| 202303-LWZ | 1.25E+06 | 8.11E+08 | 651 | 6.91E+04 | 669 |
| 202303-NTZH | 1.64E+06 | 1.02E+09 | 623 | 1.25E+05 | 637 |
| 202303-SM | 1.59E+06 | 1.00E+09 | 630 | 2.00E+05 | 628 |
| 202303-WH | 1.21E+06 | 7.96E+08 | 658 | 1.46E+05 | 688 |
| 202303-XC | 1.84E+06 | 1.23E+09 | 668 | 1.71E+05 | 688 |
| 202303-XCC | 1.30E+06 | 8.80E+08 | 675 | 2.42E+05 | 695 |
| 202303-XL | 1.62E+06 | 1.08E+09 | 669 | 2.10E+05 | 696 |
| 202303-YL | 1.34E+06 | 8.00E+08 | 595 | 8.97E+04 | 590 |
| 202303-ZC | 1.32E+06 | 9.02E+08 | 685 | 1.86E+05 | 716 |
| 202303-ZL | 1.29E+06 | 8.91E+08 | 690 | 2.71E+05 | 0 |
| 202307-BH | 1.90E+06 | 1.09E+09 | 571 | 1.20E+05 | 563 |
| 202307-CD | 1.45E+06 | 1.02E+09 | 706 | 1.53E+05 | 761 |
| 202307-HJH | 1.26E+06 | 7.39E+08 | 589 | 1.78E+05 | 573 |
| 202307-HJK | 1.32E+06 | 8.51E+08 | 646 | 2.38E+05 | 663 |
| 202307-HPL | 1.47E+06 | 9.29E+08 | 631 | 1.81E+05 | 633 |
| 202307-HS | 1.40E+06 | 9.02E+08 | 646 | 2.40E+05 | 649 |
| 202307-HX | 1.29E+06 | 8.75E+08 | 680 | 2.45E+05 | 708 |
| 202307-JS | 1.23E+06 | 8.10E+08 | 659 | 1.38E+05 | 677 |
| 202307-JX | 1.58E+06 | 1.05E+09 | 664 | 1.11E+05 | 674 |
| 202307-KLGG | 1.96E+06 | 1.17E+09 | 599 | 2.29E+05 | 592 |
| 202307-LBZ | 1.67E+06 | 1.10E+09 | 657 | 1.05E+05 | 677 |
| 202307-LWZ | 1.33E+06 | 8.44E+08 | 634 | 1.91E+05 | 640 |
| 202307-NTZH | 1.23E+06 | 8.51E+08 | 694 | 1.31E+05 | 735 |
| 202307-SJT | 1.51E+06 | 1.02E+09 | 676 | 1.25E+05 | 711 |
| 202307-SM | 1.62E+06 | 9.84E+08 | 606 | 9.66E+04 | 599 |
| 202307-TXH | 1.31E+06 | 8.89E+08 | 680 | 2.37E+05 | 714 |
| 202307-WH | 1.32E+06 | 8.04E+08 | 611 | 1.75E+05 | 616 |
| 202307-XC | 1.76E+06 | 1.09E+09 | 618 | 1.42E+05 | 625 |
| 202307-XCC | 1.14E+06 | 8.54E+08 | 748 | 4.98E+05 | 822 |
| 202307-XL | 1.17E+06 | 7.82E+08 | 670 | 7.87E+04 | 701 |
| 202307-YL | 1.40E+06 | 9.33E+08 | 668 | 3.68E+05 | 695 |
| 202307-ZC | 1.56E+06 | 9.73E+08 | 625 | 1.31E+05 | 628 |
| 202307-ZL | 9.46E+05 | 6.51E+08 | 688 | 3.93E+05 | 699 |
| 202312-DXH | 1.33E+06 | 8.25E+08 | 620 | 1.30E+05 | 610 |
| 202312-ELM | 1.63E+06 | 1.11E+09 | 679 | 2.11E+05 | 693 |
| 202312-HPL | 5.41E+06 | 3.99E+09 | 737 | 6.95E+05 | 794 |
| 202312-HX | 1.48E+06 | 1.10E+09 | 742 | 4.44E+05 | 684 |
| 202312-HL | 1.69E+06 | 1.13E+09 | 668 | 1.33E+05 | 785 |
| 202312-JX | 1.73E+06 | 1.23E+09 | 711 | 4.72E+05 | 740 |
| 202312-LBZ | 1.57E+06 | 1.11E+09 | 705 | 1.99E+05 | 732 |
| 202312-LWZ | 1.68E+06 | 1.14E+09 | 679 | 2.49E+05 | 696 |
| 202312-SJT | 1.37E+06 | 1.01E+09 | 739 | 3.87E+05 | 799 |
| 202312-SM | 1.55E+06 | 1.08E+09 | 696 | 3.19E+05 | 723 |
| 202312-XC | 1.55E+06 | 1.03E+09 | 665 | 2.17E+05 | 673 |
| 202312-XCC | 1.61E+06 | 1.12E+09 | 699 | 5.53E+05 | 731 |
| 202312-XL | 1.59E+06 | 1.09E+09 | 685 | 2.25E+05 | 706 |
| 202312-ZC | 1.67E+06 | 1.10E+09 | 654 | 3.25E+05 | 656 |
| 202404-BH | 1.68E+06 | 1.01E+09 | 602 | 2.18E+05 | 593 |
| 202404-BX | 1.90E+06 | 1.25E+09 | 658 | 4.87E+05 | 675 |
| 202404-DXH | 1.62E+06 | 1.06E+09 | 654 | 2.45E+05 | 668 |
| 202404-ELM | 1.58E+06 | 1.00E+09 | 634 | 2.58E+05 | 636 |
| 202404-HJH | 1.59E+06 | 9.68E+08 | 608 | 1.89E+05 | 605 |
| 202404-HJK | 1.17E+06 | 8.98E+08 | 765 | 2.03E+05 | 837 |
| 202404-HL | 1.48E+06 | 1.11E+09 | 750 | 4.68E+05 | 826 |
| 202404-HPL | 1.36E+06 | 9.06E+08 | 667 | 1.32E+05 | 693 |
| 202404-HS | 1.18E+06 | 9.22E+08 | 779 | 4.63E+05 | 871 |
| 202404-HX | 1.35E+06 | 9.27E+08 | 686 | 2.94E+05 | 702 |
| 202404-JS | 1.63E+06 | 1.10E+09 | 676 | 2.91E+05 | 687 |
| 202404-JX | 1.61E+06 | 1.14E+09 | 710 | 4.37E+05 | 748 |
| 202404-KLGG | 1.46E+06 | 9.13E+08 | 623 | 4.55E+05 | 618 |
| 202404-LBZ | 1.57E+06 | 1.03E+09 | 653 | 2.74E+05 | 666 |
| 202404-LWZ | 1.54E+06 | 1.07E+09 | 691 | 3.37E+05 | 731 |
| 202404-NTZH | 1.50E+06 | 1.02E+09 | 676 | 1.98E+05 | 703 |
| 202404-SJT | 1.20E+06 | 8.97E+08 | 747 | 4.98E+05 | 803 |
| 202404-SM | 1.06E+06 | 8.57E+08 | 811 | 3.76E+05 | 937 |
| 202404-TXH | 1.26E+06 | 8.95E+08 | 712 | 2.62E+05 | 751 |
| 202404-WH | 1.79E+06 | 1.14E+09 | 637 | 4.18E+05 | 646 |
| 202404-XC | 1.38E+06 | 9.63E+08 | 700 | 3.13E+05 | 728 |
| 202404-XCC | 1.15E+06 | 8.88E+08 | 769 | 7.65E+05 | 840 |
| 202404-XL | 1.63E+06 | 1.13E+09 | 694 | 6.23E+05 | 722 |
| 202404-YL | 1.44E+06 | 1.13E+09 | 782 | 4.56E+05 | 873 |
| 202404-ZC | 1.60E+06 | 1.05E+09 | 655 | 1.73E+05 | 680 |
| 202404-ZL | 1.44E+06 | 1.05E+09 | 730 | 3.29E+05 | 784 |

Table S5. Functional categories and pathways in this study

| Function category | Pathway # |
| --- | --- |
| Amino Acid Biosynthesis (n=40) | ARGSYN-PWY: L-arginine biosynthesis I (via L-ornithine); ARGSYNBSUB-PWY: L-arginine biosynthesis II (acetyl cycle); PWY-5154: L-arginine biosynthesis III (via N-acetyl-L-citrulline); CITRULBIO-PWY: L-citrulline biosynthesis; HISTSYN-PWY: L-histidine biosynthesis; METSYN-PWY: L-homoserine and L-methionine biosynthesis; ILEUSYN-PWY: L-isoleucine biosynthesis I (from threonine); PWY-5101: L-isoleucine biosynthesis II; PWY-5103: L-isoleucine biosynthesis III; PWY-5104: L-isoleucine biosynthesis IV; DAPLYSINESYN-PWY: L-lysine biosynthesis I; PWY-2941: L-lysine biosynthesis II; PWY-2942: L-lysine biosynthesis III; PWY-5097: L-lysine biosynthesis VI; HOMOSER-METSYN-PWY: L-methionine biosynthesis I; HSERMETANA-PWY: L-methionine biosynthesis III; GLUTORN-PWY: L-ornithine biosynthesis; ARGININE-SYN4-PWY: L-ornithine de novo biosynthesis; PWY-4981: L-proline biosynthesis II (from arginine); VALSYN-PWY: L-valine biosynthesis; PWY-6936: seleno-amino acid biosynthesis; COMPLETE-ARO-PWY: superpathway of aromatic amino acid biosynthesis; BRANCHED-CHAIN-AA-SYN-PWY: superpathway of branched amino acid biosynthesis; PWY0-1061: superpathway of L-alanine biosynthesis; ASPASN-PWY: superpathway of L-aspartate and L-asparagine biosynthesis; PWY-3001: superpathway of L-isoleucine biosynthesis I; P4-PWY: superpathway of L-lysine, L-threonine and L-methionine biosynthesis I; PWY-724: superpathway of L-lysine, L-threonine and L-methionine biosynthesis II; PWY-5345: superpathway of L-methionine biosynthesis (by sulfhydrylation); PWY-5347: superpathway of L-methionine biosynthesis (transsulfuration); PWY-6628: superpathway of L-phenylalanine biosynthesis; THRESYN-PWY: superpathway of L-threonine biosynthesis; PWY-6630: superpathway of L-tyrosine biosynthesis; PWY-3941: β-alanine biosynthesis II; PWY-7527: L-methionine salvage cycle III; PWY-5505: L-glutamate and L-glutamine biosynthesis; SER-GLYSYN-PWY: superpathway of L-serine and glycine biosynthesis I; TRPSYN-PWY: L-tryptophan biosynthesis; PWY-5651: L-tryptophan degradation to 2-amino-3-carboxymuconate semialdehyde; PWY-6629: superpathway of L-tryptophan biosynthesis |
| Amin Acid Degradation (n=20) | PWY-4321: L-glutamate degradation IV; P162-PWY: L-glutamate degradation V (via hydroxyglutarate); PWY-5088: L-glutamate degradation VIII (to propanoate); HISDEG-PWY: L-histidine degradation I; PWY-5028: L-histidine degradation II; PWY-5030: L-histidine degradation III; ILEUDEG-PWY: L-isoleucine degradation I; LEU-DEG2-PWY: L-leucine degradation I; PWY-5280: L-lysine degradation IV; P163-PWY: L-lysine fermentation to acetate and butanoate; PWY-6318: L-phenylalanine degradation IV (mammalian, via side chain); TYRFUMCAT-PWY: L-tyrosine degradation I; VALDEG-PWY: L-valine degradation I; ORNARGDEG-PWY: superpathway of L-arginine and L-ornithine degradation; ARGDEG-PWY: superpathway of L-arginine, putrescine, and 4-aminobutanoate degradation; PWY-5004: superpathway of L-citrulline metabolism; THREOCAT-PWY: superpathway of L-threonine metabolism; GLUDEG-I-PWY: GABA shunt; PWY-6307: L-tryptophan degradation X (mammalian, via tryptamine); PWY-6309: L-tryptophan degradation XI (mammalian, via kynurenine) |
| Carbohydrate Degradation (n=27) | PWY-7118: chitin degradation to ethanol; PWY66-422: D-galactose degradation V (Leloir pathway); GALACTUROCAT-PWY: D-galacturonate degradation I; FUCCAT-PWY: fucose degradation; PWY-6317: galactose degradation I (Leloir pathway); GLUCOSE1PMETAB-PWY: glucose and glucose-1-phosphate degradation; LACTOSECAT-PWY: lactose and galactose degradation I; PWY-7295: L-arabinose degradation IV; RHAMCAT-PWY: L-rhamnose degradation I; PWY-7456: mannan degradation; PWY-6527: stachyose degradation; PWY-3801: sucrose degradation II (sucrose synthase); PWY-621: sucrose degradation III (sucrose invertase); PWY-5384: sucrose degradation IV (sucrose phosphorylase); PWY66-373: sucrose degradation V (sucrose α-glucosidase); PWY-7446: sulfoglycolysis; PWY-7345: superpathway of anaerobic sucrose degradation; GLUCUROCAT-PWY: superpathway of β-D-glucuronide and D-glucuronate degradation; PWY-2723: trehalose degradation V; PWY-6760: xylose degradation III; PWY-7294: xylose degradation IV; GLYCOCAT-PWY: glycogen degradation I (bacterial); PWY-5941: glycogen degradation II (eukaryotic); PWY-6531: mannitol cycle; PWY-6731: starch degradation III; PWY-6737: starch degradation V; PWY-6901: superpathway of glucose and xylose degradation |
| Cofactor, Carrier, and Vitamin Biosynthesis (n=53) | COA-PWY: coenzyme A biosynthesis I; COA-PWY-1: coenzyme A biosynthesis II (mammalian); RIBOSYN2-PWY: flavin biosynthesis I (bacteria and plants); HEME-BIOSYNTHESIS-II: heme biosynthesis I (aerobic); HEMESYN2-PWY: heme biosynthesis II (anaerobic); PWY-6823: molybdenum cofactor biosynthesis; 1CMET2-PWY: N10-formyl-tetrahydrofolate biosynthesis; PYRIDNUCSYN-PWY: NAD biosynthesis I (from aspartate); PANTOSYN-PWY: pantothenate and coenzyme A biosynthesis I; PWY-4221: pantothenate and coenzyme A biosynthesis II (plants); PWY-4242: pantothenate and coenzyme A biosynthesis III; PANTO-PWY: phosphopantothenate biosynthesis I; PYRIDOXSYN-PWY: pyridoxal 5'-phosphate biosynthesis I; PWY-5918: superpathay of heme biosynthesis from glutamate; PWY-5860: superpathway of demethylmenaquinol-6 biosynthesis I; PWY-5861: superpathway of demethylmenaquinol-8 biosynthesis; PWY-5862: superpathway of demethylmenaquinol-9 biosynthesis; PWY-5920: superpathway of heme biosynthesis from glycine; PWY0-1415: superpathway of heme biosynthesis from uroporphyrinogen-III; PWY-5896: superpathway of menaquinol-10 biosynthesis; PWY-5897: superpathway of menaquinol-11 biosynthesis; PWY-5898: superpathway of menaquinol-12 biosynthesis; PWY-5899: superpathway of menaquinol-13 biosynthesis; PWY-5850: superpathway of menaquinol-6 biosynthesis I; PWY-5840: superpathway of menaquinol-7 biosynthesis; PWY-5838: superpathway of menaquinol-8 biosynthesis I; PWY-5845: superpathway of menaquinol-9 biosynthesis; THISYN-PWY: superpathway of thiamin diphosphate biosynthesis I; UBISYN-PWY: superpathway of ubiquinol-8 biosynthesis (prokaryotic); PWY-6892: thiazole biosynthesis I (E. coli); PWY-6891: thiazole biosynthesis II (Bacillus); PWY-5857: ubiquinol-10 biosynthesis (prokaryotic); PWY-5855: ubiquinol-7 biosynthesis (prokaryotic); PWY-5856: ubiquinol-9 biosynthesis (prokaryotic); PYRIDNUCSAL-PWY: NAD salvage pathway I; PWY-6708: ubiquinol-8 biosynthesis (prokaryotic); PWY-6151: S-adenosyl-L-methionine cycle I; MET-SAM-PWY: superpathway of S-adenosyl-L-methionine biosynthesis; NADSYN-PWY: NAD biosynthesis II (from tryptophan); NAD-BIOSYNTHESIS-II: NAD salvage pathway II; PWY-5083: NAD/NADH phosphorylation and dephosphorylation; COBALSYN-PWY: adenosylcobalamin salvage from cobinamide I; PWY-6269: adenosylcobalamin salvage from cobinamide II; BIOTIN-BIOSYNTHESIS-PWY: biotin biosynthesis I; PWY-5005: biotin biosynthesis II; PWY-3841: folate transformations II; PWY3DJ-35471: L-ascorbate biosynthesis IV; PWY-6263: superpathway of menaquinol-8 biosynthesis II; PWY0-845: superpathway of pyridoxal 5'-phosphate biosynthesis and salvage; PWY-6612: superpathway of tetrahydrofolate biosynthesis; FOLSYN-PWY: superpathway of tetrahydrofolate biosynthesis and salvage; PWY-6895: superpathway of thiamin diphosphate biosynthesis II; PWY-6897: thiamin salvage II |
| Fatty Acid and Lipid Biosynthesis (n=10) | PWY-5667: CDP-diacylglycerol biosynthesis I; PWY0-1319: CDP-diacylglycerol biosynthesis II; FASYN-ELONG-PWY: fatty acid elongation -- saturated; FAO-PWY: fatty acid β-oxidation I; PWY-5136: fatty acid β-oxidation II (peroxisome); PWY-7664: oleate biosynthesis IV (anaerobic); FASYN-INITIAL-PWY: superpathway of fatty acid biosynthesis initiation (E. coli); PWY-6285: superpathway of fatty acids biosynthesis (E. coli); PHOSLIPSYN-PWY: superpathway of phospholipid biosynthesis I (bacteria); PWY-6284: superpathway of unsaturated fatty acids biosynthesis (E. coli) |
| Fermentation (n=11) | PWY-5109: 2-methylbutanoate biosynthesis; PWY-7003: glycerol degradation to butanol; P122-PWY: heterolactic fermentation; ANAEROFRUCAT-PWY: homolactic fermentation; PWY-5022: 4-aminobutanoate degradation V; PWY-5676: acetyl-CoA fermentation to butanoate II; P124-PWY: Bifidobacterium shunt; PWY-7013: L-1,2-propanediol degradation; PWY-5100: pyruvate fermentation to acetate and lactate II; CENTFERM-PWY: pyruvate fermentation to butanoate; P108-PWY: pyruvate fermentation to propanoate I |
| Hormone Neurotransmitter, and Signaling Molecule Biosynthesis (n=1) | PWY66-375: leukotriene biosynthesis |
| Nucleoside and Nucleotide Biosynthesis (n=32) | PWY-6121: 5-aminoimidazole ribonucleotide biosynthesis I; PWY-6122: 5-aminoimidazole ribonucleotide biosynthesis II; PWY-7220: adenosine deoxyribonucleotides de novo biosynthesis II; PWY-7219: adenosine ribonucleotides de novo biosynthesis; PWY-7222: guanosine deoxyribonucleotides de novo biosynthesis II; PWY-7221: guanosine ribonucleotides de novo biosynthesis; PWY-6123: inosine-5'-phosphate biosynthesis I; PWY-6124: inosine-5'-phosphate biosynthesis II; PWY-7234: inosine-5'-phosphate biosynthesis III; PWY-7210: pyrimidine deoxyribonucleotides biosynthesis from CTP; PWY-7184: pyrimidine deoxyribonucleotides de novo biosynthesis I; PWY-7187: pyrimidine deoxyribonucleotides de novo biosynthesis II; PWY-6545: pyrimidine deoxyribonucleotides de novo biosynthesis III; PWY-7198: pyrimidine deoxyribonucleotides de novo biosynthesis IV; PWY-6277: superpathway of 5-aminoimidazole ribonucleotide biosynthesis; PWY-7229: superpathway of adenosine nucleotides de novo biosynthesis I; PWY-6126: superpathway of adenosine nucleotides de novo biosynthesis II; PWY-7228: superpathway of guanosine nucleotides de novo biosynthesis I; PWY-6125: superpathway of guanosine nucleotides de novo biosynthesis II; PWY-841: superpathway of purine nucleotides de novo biosynthesis I; DENOVOPURINE2-PWY: superpathway of purine nucleotides de novo biosynthesis II; PWY-7211: superpathway of pyrimidine deoxyribonucleotides de novo biosynthesis; PWY0-166: superpathway of pyrimidine deoxyribonucleotides de novo biosynthesis (E. coli); PWY0-162: superpathway of pyrimidine ribonucleotides de novo biosynthesis; PWY-5686: UMP biosynthesis; PWY-7197: pyrimidine deoxyribonucleotide phosphorylation; PWY-7199: pyrimidine deoxyribonucleosides salvage; PWY-7200: superpathway of pyrimidine deoxyribonucleoside salvage; PWY-7208: superpathway of pyrimidine nucleobases salvage; PWY-7196: superpathway of pyrimidine ribonucleosides salvage; PWY66-409: superpathway of purine nucleotide salvage; PWY-6609: adenine and adenosine salvage III |
| Nucleoside and Nucleotide Degradation (n=11) | SALVADEHYPOX-PWY: adenosine nucleotides degradation II; PWY-5532: adenosine nucleotides degradation IV; PWY-6606: guanosine nucleotides degradation II; PWY-6608: guanosine nucleotides degradation III; P164-PWY: purine nucleobases degradation I (anaerobic); PWY-6353: purine nucleotides degradation II (aerobic); PWY0-1296: purine ribonucleosides degradation; PWY0-1297: superpathway of purine deoxyribonucleosides degradation; PWY0-1298: superpathway of pyrimidine deoxyribonucleosides degradation; PWY-7209: superpathway of pyrimidine ribonucleosides degradation; PWY-5695: urate biosynthesis/inosine 5'-phosphate degradation |
| Carbohydrate Biosynthesis (n=8) | PWY-5659: GDP-mannose biosynthesis; GLUCONEO-PWY: gluconeogenesis I; PWY66-399: gluconeogenesis III; GLYCOGENSYNTH-PWY: glycogen biosynthesis I (from ADP-D-Glucose); PWY-5514: UDP-N-acetyl-D-galactosamine biosynthesis II; UDPNACETYLGALSYN-PWY: UDP-N-acetyl-D-glucosamine biosynthesis II; UDPNAGSYN-PWY: UDP-N-acetyl-D-glucosamine biosynthesis I; DTDPRHAMSYN-PWY: dTDP-L-rhamnose biosynthesis I |
| Amide, Amidine, Amine, and Polyamine Degradation (n=7) | ORNDEG-PWY: superpathway of ornithine degradation; GLCMANNANAUT-PWY: superpathway of N-acetylglucosamine, N-acetylmannosamine and N-acetylneuraminate degradation; PWY-7431: aromatic biogenic amine degradation (bacteria); PWY-5692: allantoin degradation to glyoxylate II; PWY-5705: allantoin degradation to glyoxylate III; PWY-4722: creatinine degradation II; PWY6666-2: dopamine degradation |
| Amide, Amidine, Amine, and Polyamine Biosynthesis (n=5) | ARG+POLYAMINE-SYN: superpathway of arginine and polyamine biosynthesis; PWY-6562: norspermidine biosynthesis; POLYAMSYN-PWY: superpathway of polyamine biosynthesis I; POLYAMINSYN3-PWY: superpathway of polyamine biosynthesis II; PWY-6305: putrescine biosynthesis IV |
| Inorganic Nutrient Metabolism (n=4) | PWY-6748: nitrate reduction VII (denitrification); PWY-4984: urea cycle; SO4ASSIM-PWY: sulfate reduction I (assimilatory); SULFATE-CYS-PWY: superpathway of sulfate assimilation and cysteine biosynthesis |
| TCA cycle (n=4) | P105-PWY: TCA cycle IV (2-oxoglutarate decarboxylase); REDCITCYC: TCA cycle VIII (helicobacter); TCA: TCA cycle I (prokaryotic); PWY-7254: TCA cycle VII (acetate-producers) |
| Carboxylic Acid Degradation (n=3) | GALACTARDEG-PWY: D-galactarate degradation I; GLUCARDEG-PWY: D-glucarate degradation I; P441-PWY: superpathway of N-acetylneuraminate degradation |
| Glycolysis (n=3) | GLYCOLYSIS: glycolysis I (from glucose 6-phosphate); PWY-5484: glycolysis II (from fructose 6-phosphate); ANAGLYCOLYSIS-PWY: glycolysis III (from glucose) |
| Other Biosynthesis (n=3) | PWY-4041: γ-glutamyl cycle; PWY-6147: 6-hydroxymethyl-dihydropterin diphosphate biosynthesis I; PWY-6519: 8-amino-7-oxononanoate biosynthesis I |
| Superpathways (n=3) | GLYCOLYSIS-E-D: superpathway of glycolysis and Entner-Doudoroff; GLYCOLYSIS-TCA-GLYOX-BYPASS: superpathway of glycolysis, pyruvate dehydrogenase, TCA, and glyoxylate bypass; PWY-561: superpathway of glyoxylate cycle and fatty acid degradation |
| Carboxylic Acid Biosynthesis (n=2) | PWY-6163: chorismate biosynthesis from 3-dehydroquinate; ARO-PWY: chorismate biosynthesis I |
| Pentose Phosphate Pathways (n=2) | PENTOSE-P-PWY: pentose phosphate pathway; NONOXIPENT-PWY: pentose phosphate pathway (non-oxidative branch) |
| Secondary Metabolite Biosynthesis (n=2) | PWY-922: mevalonate pathway I; PWY-6703: preQ0 biosynthesis |
| Tetrapyrrole Biosynthesis (n=2) | PWY-5188: tetrapyrrole biosynthesis I (from glutamate); PWY-5189: tetrapyrrole biosynthesis II (from glycine) |
| Alcohol Degradation (n=1) | GLYCOL-GLYOXDEG-PWY: superpathway of glycol metabolism and degradation |
| Aldehyde Degradation (n=1) | METHGLYUT-PWY: superpathway of methylglyoxal degradation |
| Aminoacyl-tRNA Charging (n=1) | TRNA-CHARGING-PWY: tRNA charging |
| C1 Compound Utilization and Assimilation (n=1) | P23-PWY: reductive TCA cycle I |
| Fatty Acid and Lipid Degradation (n=1) | PWY-5138: unsaturated, even numbered fatty acid β-oxidation |
| Hormone Neurotransmitter, and Signaling Molecule Degradation (n=1) | PWY-6313: serotonin degradation |
| Nitrogen Remobilization fromSenescing Leaves (n=1) | PWY-6549: L-glutamine biosynthesis III |
| Nucleic Acid Processing (n=1) | PWY-6700: queuosine biosynthesis |
| Respiration (n=1) | PWY-3781: aerobic respiration I (cytochrome c) |
| Unclassified (n=7) | PWY-6785: hydrogen production VIII; GLYOXYLATE-BYPASS: glyoxylate cycle; PWY66-367: ketogenesis; GLUCARGALACTSUPER-PWY: superpathway of D-glucarate and D-galactarate degradation; FUC-RHAMCAT-PWY: superpathway of fucose and rhamnose degradation; GALACT-GLUCUROCAT-PWY: superpathway of hexuronide and hexuronate degradation; PRPP-PWY: superpathway of histidine, purine, and pyrimidine biosynthesis |

Table S6. List of clinically relevant antibiotic resistance genes detected in gut commensal bacteria in this study

| Class | Gene |
| --- | --- |
| Multidrug | abeS, acrA, acrF, adeF, amrB, bpeF, ceoB, cmeC, efrA, efrB, emrA, emrB, emrE, LmrS, mdsA, mdsB, mdtE, mdtF, mdtK, MexA, MexB, MexC, MexD, MexE, MexF, mexK, mexN, mexQ, mexW, msbA, mtrD, mtrE, MuxA, MuxB, MuxC, opcM, oprA, oprC, OprJ, OprM, oqxB, ParS, patA, patB, pmrA, qacEdelta1, qacH, RanA, RanB, salD, sdeY, smeD, smeE |
| Beta-lactam | Bla1, BSU-1, CblA-1, CBP-1, CcrA, cepA, CfxA2, CfxA3, CfxA4, CfxA5, CfxA6, CTX-M-10, CTX-M-126, CTX-M-13, DES-1, EXO, LRA-2, LUT-1, LUT-2, LUT-3, LUT-4, LUT-5, LUT-6, mecB, mreA, NmcA, OXA-10, OXA-129, OXA-209, OXA-232, OXA-302, OXA-347, OXA-427, OXA-454, OXA-474, OXA-475, OXA-55, OXA-63, PAU-1, VEB-7 |
| Vancomycin | vanA, vanC, vanD, vanE, vanG, vanHA, vanHB, vanHD, vanN, vanP, vanTG, vanUG, vanX, vanXB, vanXF, vanXO, vanYA, vanYB, vanYD, vanZF |
| Polymyxin | mcr-5.2, pmrF, rosA, rosB, ugd |
| Quinolone | AbaQ, norB |

Figure S1. Locations of Wastewater Treatment Plants (WWTPs) in Wuhan, China.

Figure S2. Bioinformatic Workflow for Metagenomic Analysis in This Study.

Figure S3. Rarefaction Curves of all samples across five collection timepoints.


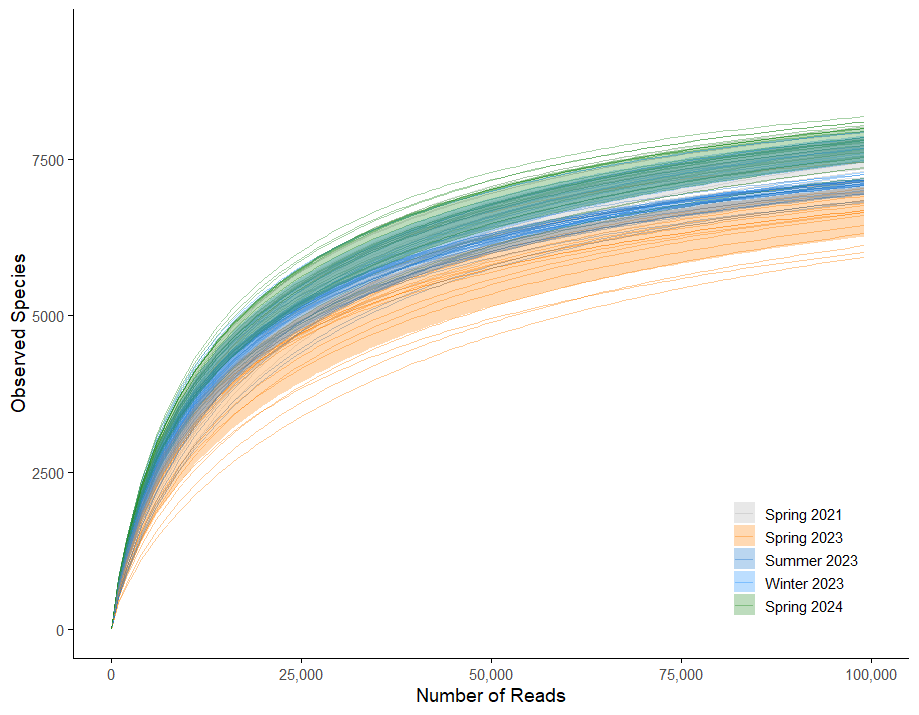


Figure S4. Spearman Correlations Between Commensal Genera and Gut Microbial Functional Pathways. Statistical significance is indicated by asterisks (p < 0.05, p < 0.01, p < 0.001).


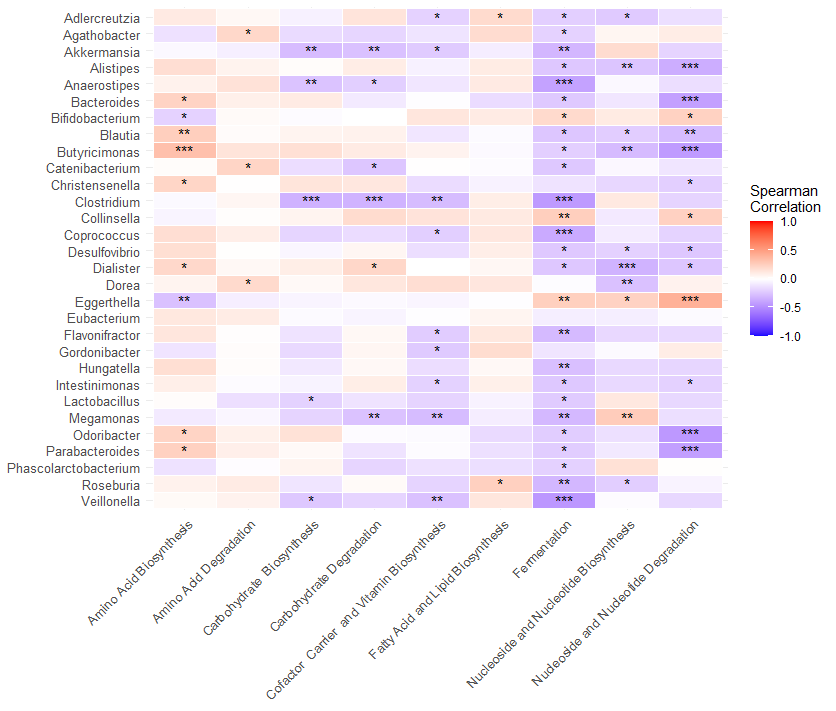


Figure S5. Spearman Correlations Between Clinically Confirmed Pathogenic Genera and Virulence-Associated Functions. Statistical significance is indicated by asterisks (p < 0.05, p < 0.01, p < 0.001).


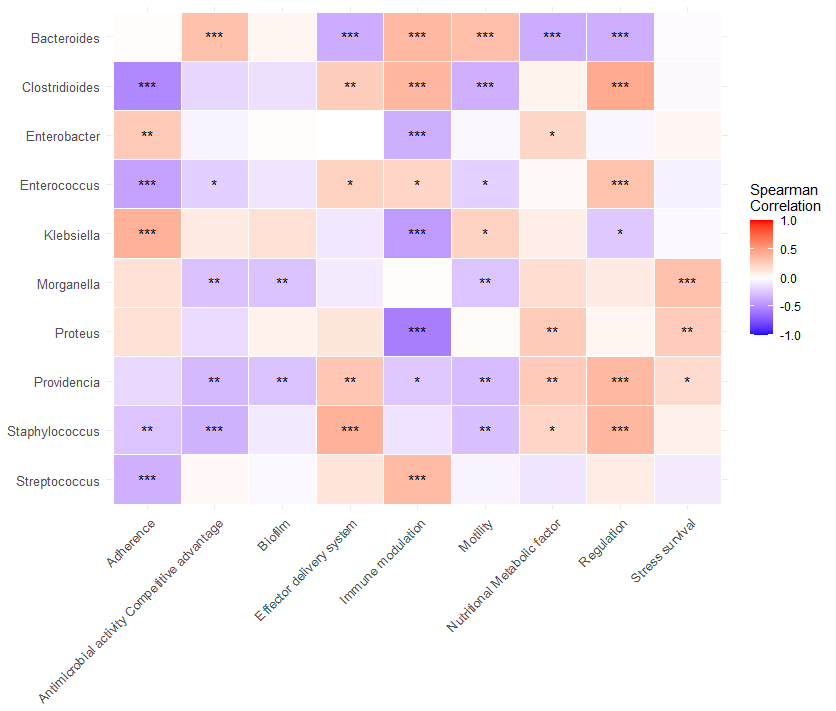


**References**

1. Akbuğa-Schön, T. et al. The keystone gut species Christensenella minuta boosts gut microbial biomass and voluntary physical activity in mice. *mBio* **15**, e0283623 (2024).
2. Babińska, I. et al. The effect of Lactobacillus acidophilus and Bifidobacterium spp. administration on the morphology of the gastrointestinal tract, liver and pancreas in piglets. *Pol. J. Vet. Sci.* **8**, 29–35 (2005).
3. Balaguer, F. et al. Lipoteichoic acid from Bifidobacterium animalis subsp. lactis BPL1: a novel postbiotic that reduces fat deposition via IGF-1 pathway. *Microb. Biotechnol.* **15**, 805–816 (2022).
4. Bou Sanayeh, E. et al. Hungatella hathewayi bacteremia due to acute appendicitis: a case report and a narrative review. *Anaerobe* **86**, 102838 (2024).
5. Chen, D. et al. Clostridium butyricum, a butyrate-producing probiotic, inhibits intestinal tumor development through modulating Wnt signaling and gut microbiota. *Cancer Lett.* **469**, 456–467 (2020).
6. Chen, Y. et al. Bifidobacterium inhibits the progression of colorectal tumorigenesis in mice through fatty acid isomerization and gut microbiota modulation. *Gut Microbes* **17**, 2464945 (2025).
7. Chong, K. K. L. et al. Enterococcus faecalis modulates immune activation and slows healing during wound infection. *J. Infect. Dis.* **216**, 1644–1654 (2017).
8. Cui, Y. et al. Roles of intestinal Parabacteroides in human health and diseases. *FEMS Microbiol. Rev.* **369**, fnac072 (2022).
9. Davoren, M. J. et al. A novel probiotic, Lactobacillus johnsonii 456, resists acid and can persist in the human gut beyond the initial ingestion period. *Gut Microbes* **10**, 458–480 (2019).
10. Doden, H.L. et al. Completion of the gut microbial epi-bile acid pathway. *Gut Microbes* **13**, 1–20 (2021).
11. Dziarski, R., Park, S. Y., Kashyap, D. R., Dowd, S. E., & Gupta, D. Pglyrp-regulated gut microflora Prevotella falsenii, Parabacteroides distasonis and Bacteroides eggerthii enhance and Alistipes finegoldii attenuates colitis in mice. *PLOS ONE* **11**, e0146162 (2016).
12. Engevik, M.A. et al. Bifidobacterium dentium fortifies the intestinal mucus layer via autophagy and calcium signaling pathways. *mBio* **10**, e01087–19 (2019).
13. Everard, A. et al. Cross-talk between Akkermansia muciniphila and intestinal epithelium controls diet-induced obesity. *Proc. Natl. Acad. Sci. U.S.A.* **110**, 9066–9071 (2013).
14. Ezeji, J. C. et al. Parabacteroides distasonis: intriguing aerotolerant gut anaerobe with emerging antimicrobial resistance and pathogenic and probiotic roles in human health. *Gut Microbes* **13**, 1922241 (2021).
15. Fan, L. et al. B. adolescentis ameliorates chronic colitis by regulating Treg/Th2 response and gut microbiota remodeling. *Gut Microbes* **13**, 1–17 (2021).
16. Fu, T. et al. Isolation of Alginate-Degrading Bacteria from the Human Gut Microbiota and Discovery of Bacteroides xylanisolvens AY11-1 as a Novel Anti-Colitis Probiotic Bacterium. *Nutrients* **15**, 1352 (2023).
17. Hamilton, A. L., Kamm, M. A., Ng, S. C., & Morrison, M. Proteus spp. as Putative Gastrointestinal Pathogens. *Clinical microbiology reviews*, **31**(3), e00085-17 (2018).
18. Huang, W. et al. Roseburia hominis improves host metabolism in diet-induced obesity. *Gut Microbes* **17**, 2467193 (2025).
19. Ihekweazu, F.D. et al. Bacteroides ovatus promotes IL-22 production and reduces trinitrobenzene sulfonic acid-driven colonic inflammation. *Am. J. Pathol.* **191**, 704–719 (2021).
20. Jaagura, M. et al. Consumption of multi-fiber enriched yogurt is associated with increase of Bifidobacterium animalis and butyrate producing bacteria in human fecal microbiota. *J. Funct. Foods* **88** (2022).
21. Jie, Z. et al. A consortium of three-bacteria isolated from human feces inhibits formation of atherosclerotic deposits and lowers lipid levels in a mouse model. *iScience* **26** (2023).
22. Joyce, L. R. et al. Streptococcus agalactiae glycolipids promote virulence by thwarting immune cell clearance. *Sci. Adv.* **10**, eadn7848 (2024).
23. Kanauchi, O. et al. Eubacterium limosum ameliorates experimental colitis and metabolite of microbe attenuates colonic inflammatory action with increase of mucosal integrity. *World J. Gastroenterol.* **12**, 1071–1077 (2006).
24. Kiani, D., Santus, W., Kiernan, K. A., & Behnsen, J. Proteus mirabilis employs a contact-dependent killing system against competing enterobacteriaceae. *mSphere* **6**, 10–1128 (2021).
25. Kim, H. et al. Co-Culture with Bifidobacterium catenulatum Improves the Growth, Gut Colonization, and Butyrate Production of Faecalibacterium prausnitzii: In Vitro and In Vivo Studies. *Microorganisms* **8**, 788 (2020).
26. Klein, J. A. et al. Pathogenic diversification of the gut commensal Providencia alcalifaciens via acquisition of a second type III secretion system. *Infect. Immun.* **92**, e00314–24 (2024).
27. Lai, C. H. et al. Gut commensal Parabacteroides goldsteinii MTS01 alters gut microbiota composition and reduces cholesterol to mitigate Helicobacter pylori-induced pathogenesis. *Front. Immunol.* **13**, 916848 (2022).
28. Lee, H. et al. A novel bacterium, Butyricimonas virosa, preventing HFD-induced diabetes and metabolic disorders in mice via GLP-1 receptor. *Front. Microbiol.* **13**, 858192 (2022).
29. Li, H. et al. Bacteroides thetaiotaomicron ameliorates mouse hepatic steatosis through regulating gut microbial composition, gut-liver folate and unsaturated fatty acids metabolism. *Gut Microbes* **16**, 2304159 (2024).
30. Liébana-García, R. et al. Gut commensal phascolarctobacterium faecium retunes innate immunity to mitigate obesity and metabolic disease in mice. *Nat. Microbiol.*, 1–13 (2025).
31. Liu, C. et al. Bacteroides uniformis ameliorates pro-inflammatory diet-exacerbated colitis by targeting endoplasmic reticulum stress-mediated ferroptosis. *J. Adv. Res.* (2024).
32. Liu, D. et al. Anaerostipes hadrus, a butyrate-producing bacterium capable of metabolizing 5-fluorouracil. *mSphere* **9**, e0081623 (2024).
33. Liu, S. et al. Enhancement of gut barrier integrity by a Bacillus subtilis secreted metabolite through the GADD45A-Wnt/β-catenin pathway. *iMeta* e70005 (2025).
34. Luo, S. et al. Flavonifractor plautii protects against elevated arterial stiffness. *Circ. Res.* **132**, 167–181 (2023).
35. Lv, X. et al. Gut commensal Agathobacter rectalis alleviates microglia-mediated neuroinflammation against pathogenesis of Alzheimer disease. *iScience* **27** (2024).
36. Lyu, Z. et al. Anaerostipes caccae CML199 enhances bone development and counteracts aging-induced bone loss through the butyrate-driven gut-bone axis: the chicken model. *Microbiome* **12**, 215 (2024).
37. Ma, J. et al. Arbutin improves gut development and serum lipids via Lactobacillus intestinalis. *Front. Nutr.* **9**, 948573 (2022).
38. Mandal, R.K. et al. Gut Bacteroides act in a microbial consortium to cause susceptibility to severe malaria. *Nat. Commun.* **14**, 6465 (2023).
39. McCurry, M.D. et al. Gut bacteria convert glucocorticoids into progestins in the presence of hydrogen gas. *Cell* **187**, 2952–2968.e13 (2024).
40. Meza-Torres, J. et al. Clostridioides difficile binary toxin CDT induces biofilm-like persisting microcolonies. *Gut Microbes* **17**, 2444411 (2025).
41. Moens, F. et al. Bifidobacterial inulin-type fructan degradation capacity determines cross-feeding interactions between bifidobacteria and Faecalibacterium prausnitzii. *Int. J. Food Microbiol.* **231**, 76–85 (2016).
42. Mohebali, N. et al. Faecalibacterium prausnitzii, Bacteroides faecis and Roseburia intestinalis attenuate clinical symptoms of experimental colitis by regulating Treg/Th17 cell balance and intestinal barrier integrity. *Biomed. Pharmacother.* **167**, 115568 (2023).
43. Morotomi, M. et al. Dialister succinatiphilus sp. nov. and Barnesiella intestinihominis sp. nov., isolated from human faeces. *Int. J. Syst. Evol. Microbiol.* **58**, 2716–2720 (2008).
44. Oñate, F. P. et al. Adlercreutzia equolifaciens is an anti-inflammatory commensal bacterium with decreased abundance in gut microbiota of patients with metabolic liver disease. *Int. J. Mol. Sci.* **24**, 12232 (2023).
45. Pan, L.L. et al. Infant feces-derived Lactobacillus gasseri FWJL-4 mitigates experimental necrotizing enterocolitis via acetate production. *Gut Microbes* **16**, 2430541 (2024).
46. Prudêncio, A.P.A. et al. Red meat intake, indole-3-acetate, and Dorea longicatena together affect insulin resistance after gastric bypass. *Nutrients* **15**, 1185 (2023).
47. Qiao, S. et al. Gut Parabacteroides merdae protects against cardiovascular damage by enhancing branched-chain amino acid catabolism. *Nat. Metab.* **4**, 1271–1286 (2022).
48. Rampanelli, E. et al. Gut bacterium Intestinimonas butyriciproducens improves host metabolic health: evidence from cohort and animal intervention studies. *Microbiome* **13**, 15 (2025).
49. Ryu, S.W. et al. Anti-obesity activity of human gut microbiota Bacteroides stercoris KGMB02265. *Arch. Microbiol.* **206**, 19 (2023).
50. Sarah, L. et al. A mouse model of Staphylococcus aureus small intestinal infection. *J. Med. Microbiol.* **69**, 290–297 (2020).
51. Sato, J. et al. Relative abundance of Megamonas hypermegale and Butyrivibrio species decreased in the intestine and its possible association with the T cell aberration by metabolite alteration in patients with Behcet's disease. *Clin. Rheumatol.* **38**, 1437–1445 (2019).
52. Scheiman, J. et al. Meta-omics analysis of elite athletes identifies a performance-enhancing microbe that functions via lactate metabolism. *Nat. Med.* **25**, 1104–1109 (2019).
53. Shibata, M. et al. Mouse model of anti-obesity effects of Blautia hansenii on diet-induced obesity. *Curr. Issues Mol. Biol.* **45**, 7147–7160 (2023).
54. Shiver, A. L. et al. Genome-scale resources in the infant gut symbiont bifidobacterium breve reveal genetic determinants of colonization and host-microbe interactions. *Cell* **188**, 2003–2021.e19 (2025).
55. Soria-Bustos, J. et al. Two type VI secretion systems of Enterobacter cloacae are required for bacterial competition, cell adherence, and intestinal colonization. *Front. Microbiol.* **11**, 560488 (2020).
56. Takeuchi, T. et al. Gut microbial carbohydrate metabolism contributes to insulin resistance. *Nature* **621**, 389–395 (2023).
57. Tan, Y. H. et al. Hypervirulent Klebsiella pneumoniae employs genomic island encoded toxins against bacterial competitors in the gut. *ISME J.* **18**, wrae054 (2024).
58. Tang, D. et al. Gut microbiota-mediated C-sulfonate metabolism impairs the bioavailability and anti-cholestatic efficacy of andrographolide. *Gut Microbes* **16**, 2387402 (2024).
59. Toney, A. et al. Introducing Gordonibacter urolithinfaciens into gut ecosystems to study its role in mediating the metabolic benefits of dietary polyphenols. *Curr. Dev. Nutr.* **4**, 1594 (2020).
60. Vallier, M. et al. Pathometagenomics reveals susceptibility to intestinal infection by Morganella to be mediated by the blood group-related B4galnt2 gene in wild mice. *Gut Microbes* **15**, 2164448 (2023).
61. Wang, L.L. et al. A gut Eggerthella lenta-derived metabolite impairs neutrophil function to aggravate bacterial lung infection. *Sci. Transl. Med.* **17**, eadq4409 (2025).
62. Wang, Y. et al. Bacteroides salyersiae is a potent chondroitin sulfate-degrading species in the human gut microbiota. *Microbiome* **12**, 41 (2024).
63. Wolf, A. R. et al. Bioremediation of a Common Product of Food Processing by a Human Gut Bacterium. *Cell Host Microbe* **26**, 463–477.e8 (2019).
64. Wu, Y. et al. Lactobacillus amylovorus promotes lactose utilization in small intestine and enhances intestinal barrier function in intrauterine growth restricted piglets. *J. Nutr.* **154**, 535–542 (2024).
65. Xia, Y. et al. Bacteroides Fragilis in the gut microbiomes of Alzheimer’s disease activates microglia and triggers pathogenesis in neuronal C/EBPβ transgenic mice. *Nat Commun.* **14**, 5471 (2023).
66. Xu, L. et al. Coprococcus eutactus screened from healthy adolescent attenuates chronic restraint stress-induced depression-like changes in adolescent mice: potential roles in the microbiome and neurotransmitter modulation. *J. Affect. Disord.* **356**, 737–752 (2024).
67. Yang, X. et al. Inulin-enriched Megamonas funiformis ameliorates metabolic dysfunction-associated fatty liver disease by producing propionic acid. *npj Biofilms Microbiomes* **9**, 84 (2023).
68. Yang, Y.N. et al. The berberine-enriched gut commensal Blautia producta ameliorates high-fat diet (HFD)-induced hyperlipidemia and stimulates liver LDLR expression. *Biomed. Pharmacother.* **155**, 113749 (2022).
69. Yasuma, T. et al. Degradation products of complex arabinoxylans by Bacteroides intestinalis enhance the host immune response. *Microorganisms* **9**, 1126 (2021).
70. Zeng, Q. et al. Bifidobacterium pseudocatenulatum NCU-08 ameliorated senescence via modulation of the AMPK/Sirt1 signaling pathway and gut microbiota in mice. *Food Funct.* **15**, 4095–4108 (2024).
71. Zha, H. et al. Characteristics of the gut microbiota in Bifidobacterium catenulatum LI10 pretreated rats with lower levels of D-galactosamine-induced liver damage. *J. Appl. Microbiol.* **133**, 375–384 (2022).
72. Zhan, Z. et al. Overabundance of Veillonella parvula promotes intestinal inflammation by activating macrophages via LPS-TLR4 pathway. *Cell Death Discov.* **8**, 251 (2022).
73. Zhang, C. et al. Assessment of the safety and probiotic properties of Roseburia intestinalis: A potential “Next Generation Probiotic”. *Front. Microbiol.* **13**, 973046 (2022).
74. Zhang, S. M., & Huang, S. L. The commensal anaerobe Veillonella dispar reprograms its lactate metabolism and short-chain fatty acid production during the stationary phase. *Microbiol. Spectr.* **11**, e03558–22 (2023).
75. Zhang, X. et al. Tissue-resident Lachnospiraceae family bacteria protect against colorectal carcinogenesis by promoting tumor immune surveillance. *Cell Host Microbe* **31**, 418–432.e8 (2023).
