# Supplementary figures and images for: Wastewater-based Surveillance Reveals Incomplete Gut Microbiome Recovery Following Easing of COVID-19 Restrictions in Wuhan, China
Source: Research Square preprint supplement (doi:10.21203/rs.3.rs-6822143/v1), 2025-08-11

Graphic Abstract

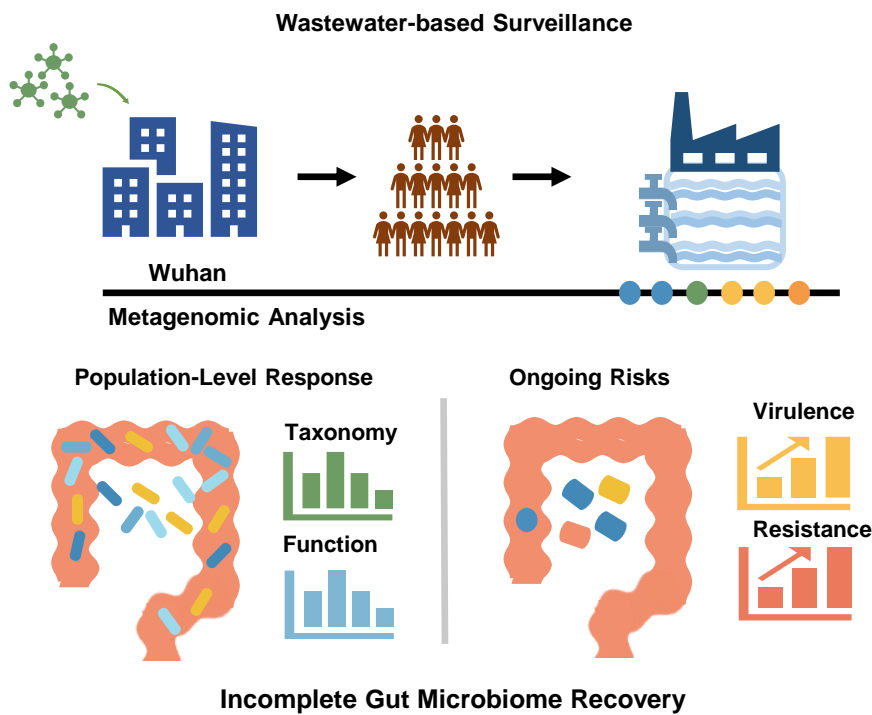

Supplement: Supplementary file 1 [file e887974ebc55bff209fec635.pdf]
